# Supplementary material for: Immunological balance between Treg and Th17 lymphocytes as a key element of type 1 diabetes progression in children
Source: PubMed Central journal article supplement (PMC9449530; doi:10.3389/fimmu.2022.958430), 2022-08-24

**A**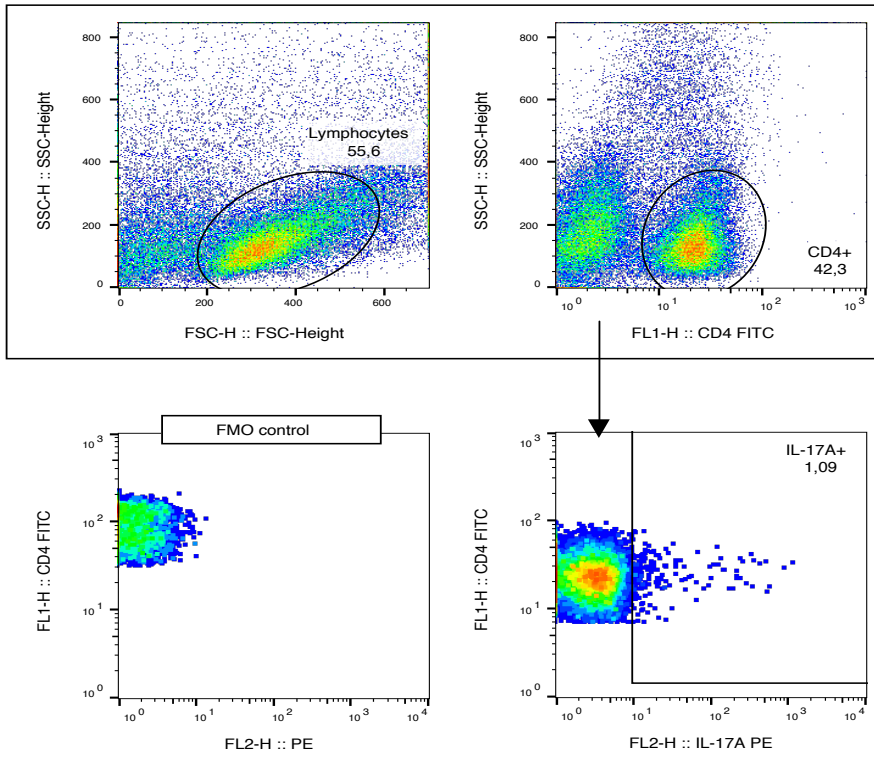**B**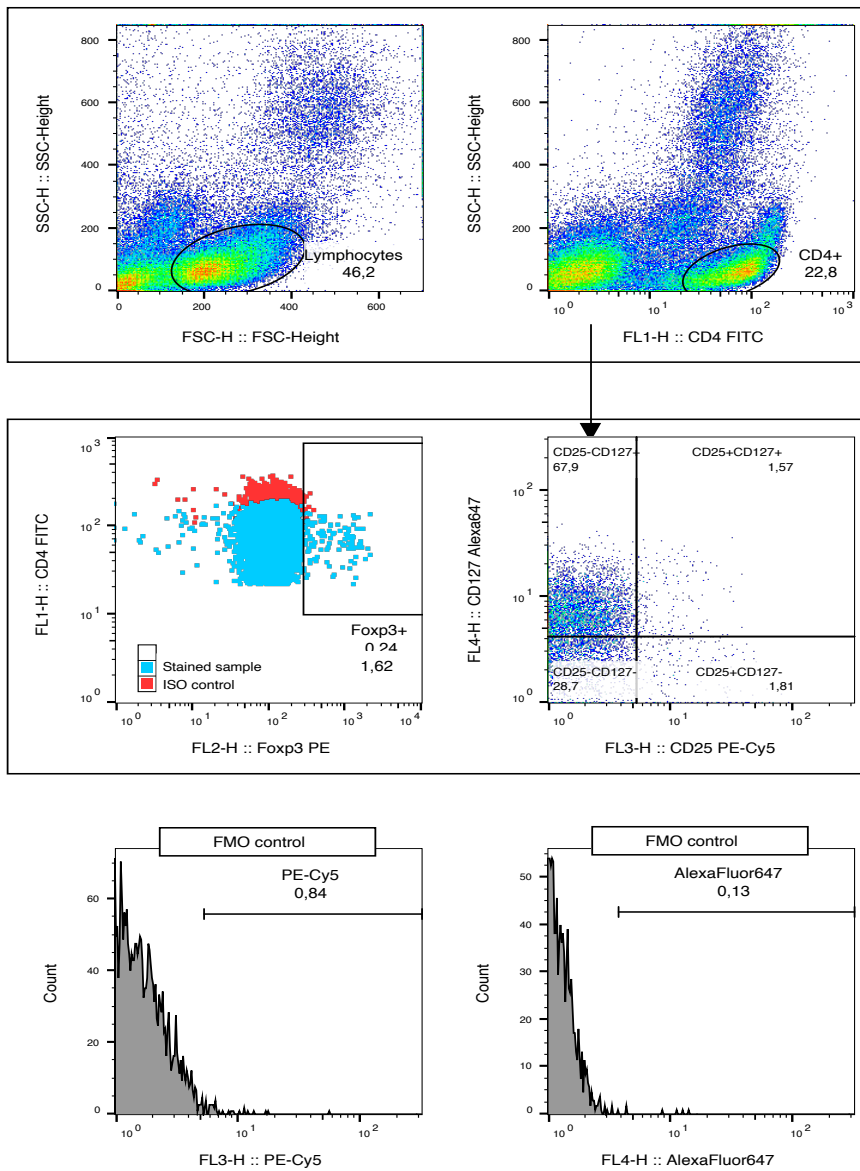

Supplement: DataSheet_1.pdf [file DataSheet_1.pdf]
